# Supplementary material
Source: publisher site journal article supplement (https://www.dovepress.com/get_supplementary_file.php?f=510739.xlsx)
Supplement: Supplementary file 1 [file get_supplementary_file.php]

## Sheet: Figure S1
Figure S1. Forest plots for the Mendelian randomization of acne vulgaris as the outcome and (A) chronicity, (B) daytime sleepiness, (C) insomnia, and (D) physical activity as the exposures.

## Sheet: Figure S2
Figure S2. Funnel plots for the Mendelian randomization of acne vulgaris as the outcome and (A) chronicity, (B) daytime sleepiness, (C) insomnia, and (D) physical activity as the exposures.

## Sheet: Figure S3 
Figure S3. Leave-one-out analyses for the Mendelian randomization of acne vulgaris as the outcome and (A) chronicity, (B) daytime sleepiness, (C) insomnia, and (D) physical activity as the exposures.

## Sheet: Table S1
Table S1. SNPs included for chronotype in the FinnGen Database
SNP	chr.exposure	pos.exposure	effect_allele.exposure	other_allele.exposure	eaf.exposure	beta.exposure	se.exposure	pval.exposure	id.exposure	samplesize.exposure	exposure	r2	F
rs17374439	1	7888438	C	T	0.803508	-0.0555478	0.00566145	1.2e-22	Y2fK4q	697828	chronotype	0.000137933601137395	96.2669315918485
rs3767240	1	21163921	T	C	0.6179	-0.0312547	0.00462739	7.3e-12	Y2fK4q	697828	chronotype	6.53704808590333e-05	45.6202033905683
rs12140153	1	62579891	G	T	0.904974	0.0484879	0.00787657	4.8e-10	Y2fK4q	697828	chronotype	5.43025846679753e-05	37.8958132891242
rs7547493	1	77775233	A	G	0.82194	-0.0582789	0.00587503	2.5e-23	Y2fK4q	697828	chronotype	0.000140991485805437	98.4013983330209
rs11588913	1	79963816	G	A	0.601488	0.0252376	0.00459169	2.5e-08	Y2fK4q	697828	chronotype	4.32896220294324e-05	30.2099315588294
rs72720396	1	91191582	A	G	0.769471	-0.0430894	0.00533877	5.3e-16	Y2fK4q	697828	chronotype	9.33403747907347e-05	65.1414207033421
rs6656331	1	96971019	C	T	0.475922	0.0271244000000001	0.00451193	1.5e-09	Y2fK4q	697828	chronotype	5.17874695763205e-05	36.1405143703538
rs17575798	1	110086451	G	A	0.806886	0.0392351999999999	0.00568886	7.8e-12	Y2fK4q	697828	chronotype	6.81590071915223e-05	47.5663694289472
rs6537834	1	115108870	T	C	0.385278	-0.0252152	0.00462393	3.5e-08	Y2fK4q	697828	chronotype	4.2612345022039e-05	29.7372694521353
rs11587758	1	150327106	G	A	0.604254	-0.0346078	0.00459127	3.8e-14	Y2fK4q	697828	chronotype	8.14139015847003e-05	56.8173630104455
rs75650221	1	174421994	C	T	0.961665	-0.0646983	0.011744	3.3e-08	Y2fK4q	697828	chronotype	4.34896962677487e-05	30.3495606809139
rs11580135	1	179417780	T	C	0.317102	-0.0275921	0.00483431	1.3e-08	Y2fK4q	697828	chronotype	4.66801081772928e-05	32.5761138254449
rs1144566	1	182569626	T	C	0.0301951	0.170568	0.0131392	2.8e-38	Y2fK4q	697828	chronotype	0.000241437101586373	168.521774260344
rs10196909	2	4651199	C	A	0.481825	0.0321137000000001	0.00450856	6.2e-13	Y2fK4q	697828	chronotype	7.26984279457601e-05	50.7345415010877
rs75120545	2	44271496	C	T	0.969822	-0.0974698	0.013897	2.9e-12	Y2fK4q	697828	chronotype	7.04886234768593e-05	49.192261661173
rs786406	2	44735953	A	G	0.297822	-0.0327319	0.00492279	1e-11	Y2fK4q	697828	chronotype	6.33496044272748e-05	44.209801732519
rs10495976	2	49750698	A	T	0.609803	-0.0280661	0.00464114	8e-10	Y2fK4q	697828	chronotype	5.24014915350563e-05	36.5690395041562
rs7602425	2	50460480	C	T	0.924493	-0.0536212	0.00854512	3.2e-10	Y2fK4q	697828	chronotype	5.64239946073411e-05	39.3763522319484
rs778147	2	61606566	C	A	0.366787	0.0296842000000001	0.00466945	4.6e-10	Y2fK4q	697828	chronotype	5.79089509727567e-05	40.4127118792658
rs6744983	2	76346385	G	T	0.62256	-0.0253244	0.00464336	4.9e-08	Y2fK4q	697828	chronotype	4.26232650542203e-05	29.7448903840732
rs10520176	2	77217310	T	C	0.501844	0.0333663000000001	0.00451125	2e-13	Y2fK4q	697828	chronotype	7.83862476088746e-05	54.7042496847716
rs28380327	2	144232491	A	T	0.629168	0.0289856999999999	0.0046586	7.8e-10	Y2fK4q	697828	chronotype	5.54733326378936e-05	38.7128813539155
rs1947198	2	149390435	C	T	0.87783	-0.0396714000000001	0.00686993	3.2e-09	Y2fK4q	697828	chronotype	4.77838662379271e-05	33.3464176621088
rs11679484	2	198921604	C	A	0.626068	-0.0298469	0.00467197	1.6e-10	Y2fK4q	697828	chronotype	5.84823182286785e-05	40.8128690314403
rs138964083	2	206908054	C	T	0.941426	-0.0591602	0.00960026	1e-09	Y2fK4q	697828	chronotype	5.44153281824974e-05	37.9744971990071
rs77008212	2	239307113	A	G	0.912884	0.0825698	0.00798588	1.1e-24	Y2fK4q	697828	chronotype	0.00015317291831623	106.904419758897
rs114870822	2	239353793	G	A	0.987205	-0.108373	0.0201178	3.4e-08	Y2fK4q	697828	chronotype	4.15828994360773e-05	29.0188350691805
rs34581681	3	2435647	G	A	0.839317	0.034486	0.00617986	4.2e-08	Y2fK4q	697828	chronotype	4.462318892277e-05	31.1406110265899
rs149611468	3	8817423	T	C	0.98802	0.119935	0.0211151	1.3e-08	Y2fK4q	697828	chronotype	4.62314083943564e-05	32.2629703567587
rs13059636	3	24935790	A	G	0.528035	-0.0317863	0.0045329	3.5e-12	Y2fK4q	697828	chronotype	7.04609811413779e-05	49.1729694016328
rs115774037	3	36834668	T	C	0.973872	-0.078752	0.0140393	3.5e-08	Y2fK4q	697828	chronotype	4.50883457655455e-05	31.4652386877491
rs11712056	3	49914397	T	C	0.556466	0.031956	0.0045329	3.7e-12	Y2fK4q	697828	chronotype	7.12152868129117e-05	49.6994180938209
rs60194061	3	77301121	G	A	0.73032	-0.0326372	0.00511118	8.6e-11	Y2fK4q	697828	chronotype	5.84264726720136e-05	40.7738939936237
rs957501	3	85791657	T	A	0.336033	0.0263166999999999	0.00477453	3e-08	Y2fK4q	697828	chronotype	4.35345748783355e-05	30.3808808677824
rs13065394	3	132971327	G	T	0.711759	0.0297983	0.00497014	2.2e-09	Y2fK4q	697828	chronotype	5.15080336094378e-05	35.9454965433836
rs2102506	3	156342849	G	A	0.3605	0.0293301000000001	0.00472786	8.3e-10	Y2fK4q	697828	chronotype	5.5147461917143e-05	38.4854551349637
rs3850174	3	172364093	T	A	0.742864	0.0318495000000001	0.00519636	1.4e-09	Y2fK4q	697828	chronotype	5.3831316980772e-05	37.5669148799271
rs2239626	3	185998884	T	C	0.695468	-0.0335827	0.00490904	5e-12	Y2fK4q	697828	chronotype	6.70595387800073e-05	46.7990280299324
rs34627176	4	1006200	G	A	0.786135	-0.0298813	0.00551285	3.6e-08	Y2fK4q	697828	chronotype	4.20997918277016e-05	29.3795662055789
rs231398	4	2832189	G	A	0.837855	0.0354509	0.00615616	5.8e-09	Y2fK4q	697828	chronotype	4.75188261698673e-05	33.1614481839056
rs12498561	4	21860763	C	G	0.495316	-0.0246853	0.00451296	4.6e-08	Y2fK4q	697828	chronotype	4.28732927392843e-05	29.9193811214692
rs28634184	4	62873419	C	T	0.749415	0.0299077	0.00521122	1.3e-08	Y2fK4q	697828	chronotype	4.71974272738166e-05	32.9371464333517
rs7691121	4	83274208	C	G	0.767925	0.0340511	0.00532954	1e-10	Y2fK4q	697828	chronotype	5.84936934121916e-05	40.8208078588757
rs4339281	4	118315560	A	G	0.872986	0.0394057	0.00677257	5.3e-09	Y2fK4q	697828	chronotype	4.85111565132095e-05	33.8539886011266
rs4241964	4	137053959	T	G	0.525037	-0.0326407	0.00453345	7.2e-13	Y2fK4q	697828	chronotype	7.42814914091059e-05	51.8394067324966
rs10067113	5	26016363	C	T	0.380528	-0.0280609	0.00465694	2.5e-09	Y2fK4q	697828	chronotype	5.20272558755679e-05	36.3078608569912
rs7701529	5	63861475	A	T	0.237701	-0.0300077	0.00532109	1.7e-08	Y2fK4q	697828	chronotype	4.5571783573935e-05	31.8026247465968
rs34875688	5	88182026	T	A	0.767268	0.0320299	0.00534073	1.1e-09	Y2fK4q	697828	chronotype	5.15393746476093e-05	35.9673693885686
rs12055234	5	104037760	G	A	0.67152	-0.0271463	0.00480045	1.5e-08	Y2fK4q	697828	chronotype	4.58235883301022e-05	31.9783567130954
rs1027742	5	115904410	A	G	0.738161	0.0306919000000001	0.00514017	3.6e-09	Y2fK4q	697828	chronotype	5.10883650682478e-05	35.6526108757151
rs2910032	5	152540354	C	T	0.482294	-0.0336962999999999	0.00451163	1.1e-13	Y2fK4q	697828	chronotype	7.99308394907428e-05	55.7822767226742
rs7735794	5	175339984	G	A	0.775914	-0.0313895	0.00570769	4.5e-08	Y2fK4q	697828	chronotype	4.33391937127094e-05	30.244526965178
rs9369915	6	13191447	G	A	0.694286	-0.0371942	0.00491617	3e-14	Y2fK4q	697828	chronotype	8.20186556292439e-05	57.2394450854676
rs2842638	6	41583576	T	G	0.576697	0.0306547999999999	0.0046083	1.9e-11	Y2fK4q	697828	chronotype	6.34073432350335e-05	44.2500984815131
rs2653343	6	55133326	T	A	0.214721	0.0613434	0.00549376	5.2e-29	Y2fK4q	697828	chronotype	0.000178636557871199	124.679506950986
rs60616179	6	110244765	A	G	0.945063	0.0562524	0.009965	9.2e-09	Y2fK4q	697828	chronotype	4.56624577920973e-05	31.865905346786
rs520954	6	153135378	A	G	0.672827	-0.0422581	0.00479665	1.6e-18	Y2fK4q	697828	chronotype	0.00011121085517286	77.6144577920808
rs3877930	6	153574103	A	G	0.986059	-0.112315	0.0192049	3e-09	Y2fK4q	697828	chronotype	4.90096663780756e-05	34.2018956734434
rs9365769	6	165186963	A	G	0.436791	0.0262836	0.00457414	7.3e-09	Y2fK4q	697828	chronotype	4.73131488811665e-05	33.0179076123275
rs1494185	7	24087655	G	A	0.725563	0.028783	0.00505302	1.1e-08	Y2fK4q	697828	chronotype	4.64944909239994e-05	32.4465732104344
rs12669911	7	32262377	A	C	0.384427	-0.0294686	0.00466454	1.8e-10	Y2fK4q	697828	chronotype	5.71910584871348e-05	39.9116901716502
rs6967481	7	50642701	C	T	0.50325	-0.029923	0.00452547	1.9e-11	Y2fK4q	697828	chronotype	6.26480106563264e-05	43.7201496646637
rs202157	7	101637753	C	T	0.29887	0.0397113	0.00493645	1.3e-15	Y2fK4q	697828	chronotype	9.27278220878821e-05	64.7138859540018
rs4729854	7	102383663	T	A	0.516577	0.0443063000000001	0.00461134	1.9e-21	Y2fK4q	697828	chronotype	0.000132272888684276	92.3156716795577
rs1524472	7	115676877	A	G	0.440956	0.0252952000000001	0.00453478	2.1e-08	Y2fK4q	697828	chronotype	4.45857457258942e-05	31.1144798592052
rs13269289	8	4843924	G	A	0.673433	-0.0275790999999999	0.00485097	5.5e-09	Y2fK4q	697828	chronotype	4.63163678806518e-05	32.3222627824975
rs11786306	8	8208759	G	C	0.646069	-0.0292175	0.00474691	7e-10	Y2fK4q	697828	chronotype	5.4286537415638e-05	37.884613883114
rs13255030	8	31671330	A	G	0.58516	0.026079	0.00457953	1.5e-08	Y2fK4q	697828	chronotype	4.64698722475996e-05	32.4293920607595
rs7001604	8	33680979	T	C	0.613053	-0.0318374000000001	0.00465169	7.3e-12	Y2fK4q	697828	chronotype	6.71237351048029e-05	46.8438319062084
rs769066	8	53145698	T	C	0.816231	-0.0329101	0.00583263	1.9e-08	Y2fK4q	697828	chronotype	4.56206369666036e-05	31.8367190232579
rs4321976	8	76614958	T	C	0.778752	0.0328285	0.00543138	8.7e-10	Y2fK4q	697828	chronotype	5.23492633082974e-05	36.5325894715216
rs1470764	8	101950038	G	A	0.387169	0.0285813999999999	0.00463098	5.9e-10	Y2fK4q	697828	chronotype	5.45819551930297e-05	38.090786534135
rs12682033	8	116701130	T	C	0.240285	0.0348870000000001	0.00529299	6.1e-11	Y2fK4q	697828	chronotype	6.22514792610551e-05	43.4434051830618
rs10976942	9	8310813	C	A	0.917117	-0.0493618999999999	0.00817039	1e-09	Y2fK4q	697828	chronotype	5.23030547154161e-05	36.5003405391483
rs308521	9	37367094	T	C	0.602903	0.0279090999999999	0.00461881	1.5e-09	Y2fK4q	697828	chronotype	5.23191108826889e-05	36.5115461224533
rs62553781	9	76679777	C	T	0.965073	0.0828273000000001	0.0123021	3e-11	Y2fK4q	697828	chronotype	6.49548974251646e-05	45.3301606665493
rs10123584	9	115202610	G	A	0.292722	0.0270425999999999	0.00495784	4e-08	Y2fK4q	697828	chronotype	4.26329090466235e-05	29.751620786512
rs10818834	9	126317324	T	C	0.733086	0.0323011	0.00511442	4.2e-10	Y2fK4q	697828	chronotype	5.71568952735135e-05	39.8878474666552
rs34619169	9	139327277	G	A	0.692101	-0.0272806	0.00488632	1.5e-08	Y2fK4q	697828	chronotype	4.46659150487264e-05	31.1704290905304
rs28458909	9	140257189	C	T	0.876461	0.0676497	0.00683765	4.7e-23	Y2fK4q	697828	chronotype	0.000140251886113274	97.8851412545649
rs2893787	10	60568697	G	A	0.2553	0.0288453	0.00516506	3.5e-08	Y2fK4q	697828	chronotype	4.46921839029704e-05	31.1887618181531
rs4752593	10	123536490	G	C	0.371575	0.0265675999999999	0.00468542	9.8e-09	Y2fK4q	697828	chronotype	4.60722257060625e-05	32.1518782841519
rs6599694	10	125124884	G	T	0.656185	0.0266711	0.00476984	2.1e-08	Y2fK4q	697828	chronotype	4.48029265761439e-05	31.2660478513704
rs72632979	11	16615883	A	G	0.828665	0.0346051	0.00599706	4e-09	Y2fK4q	697828	chronotype	4.77127354518469e-05	33.2967760096857
rs10501087	11	27670108	T	C	0.799452	-0.0346934999999999	0.00562434	5.4e-10	Y2fK4q	697828	chronotype	5.45231609837705e-05	38.0497539295195
rs512647	11	30445366	G	C	0.556369	-0.0244887	0.00453866	4.2e-08	Y2fK4q	697828	chronotype	4.17166717935288e-05	29.112192674778
rs11032362	11	33759092	G	A	0.909159	-0.0672744	0.0078366	7.3e-18	Y2fK4q	697828	chronotype	0.000105596628636509	73.6958550087341
rs11229543	11	58370698	G	A	0.759944	0.0337270000000001	0.00527519	1.1e-10	Y2fK4q	697828	chronotype	5.85740672855772e-05	40.8769014039985
rs4936291	11	114009982	A	G	0.610604	-0.0276435	0.00474862	9.4e-09	Y2fK4q	697828	chronotype	4.85603426176197e-05	33.8883152756836
rs73606718	11	122814474	G	A	0.879064	0.040119	0.00691498	5.7e-09	Y2fK4q	697828	chronotype	4.82335250460239e-05	33.660231400381
rs2467109	12	23064038	T	A	0.718089	-0.0276799	0.00501668	3.9e-08	Y2fK4q	697828	chronotype	4.36243427724341e-05	30.4435286984478
rs7302062	12	24065752	T	C	0.55303	0.0317771	0.00453388	5.2e-12	Y2fK4q	697828	chronotype	7.03897651901084e-05	49.1232660587158
rs7313852	12	38908389	G	A	0.564644	0.0477061	0.00455758	3.8e-25	Y2fK4q	697828	chronotype	0.000156986624713394	109.566548859936
rs11174781	12	63516126	T	C	0.877633	0.0475212	0.00687518	3.9e-12	Y2fK4q	697828	chronotype	6.84586811487893e-05	47.7755182803077
rs7959983	12	90452978	T	C	0.595837	-0.0318282	0.00457585	4.7e-12	Y2fK4q	697828	chronotype	6.93269504842394e-05	48.3815026906562
rs7304278	12	106989915	A	G	0.274962	-0.0327762	0.00506843	9.6e-11	Y2fK4q	697828	chronotype	5.99233217689972e-05	41.8185578436698
rs9597241	13	56281271	A	C	0.811186	0.0322479	0.00579356	2.7e-08	Y2fK4q	697828	chronotype	4.4396035100736e-05	30.9820830718537
rs9573971	13	77568732	A	G	0.966149	0.108483	0.0124737	4.9e-18	Y2fK4q	697828	chronotype	0.000108377049246838	75.6365200305799
rs11841335	13	94105884	G	A	0.746028	0.0283759	0.00518535	4e-08	Y2fK4q	697828	chronotype	4.29117385919429e-05	29.9462119386797
rs10149448	14	84253271	A	G	0.603659	0.0272319	0.00461608	5.6e-09	Y2fK4q	697828	chronotype	4.98699787780667e-05	34.8023034009152
rs12927162	16	52684916	A	G	0.721652	0.0459823	0.00503141	2e-20	Y2fK4q	697828	chronotype	0.000119674492796097	83.5219680590941
rs1421085	16	53800954	T	C	0.59687	-0.0416272999999999	0.00459528	1.8e-19	Y2fK4q	697828	chronotype	0.000117579895318364	82.0599566315431
rs62046253	16	60644621	C	T	0.655839	-0.0299674	0.00473879	1.4e-10	Y2fK4q	697828	chronotype	5.73046578472517e-05	39.9909718358743
rs11645898	16	72229532	T	C	0.832897	0.0356701000000001	0.00604233	1.8e-09	Y2fK4q	697828	chronotype	4.99378330695151e-05	34.8496586160019
rs2518022	17	8057367	T	C	0.0835266	0.0626693000000001	0.00813849	7.6e-15	Y2fK4q	697828	chronotype	8.49643475434992e-05	59.2953687812107
rs3760185	17	17401736	C	T	0.751597	0.0371222	0.00527711	2.1e-12	Y2fK4q	697828	chronotype	7.09081134659475e-05	49.4850340778995
rs72829936	17	34060115	G	A	0.836049	-0.0352298	0.00610979	5.5e-09	Y2fK4q	697828	chronotype	4.76429567084986e-05	33.2480779448029
rs35653190	17	46077967	C	T	0.771778	0.0303561999999999	0.00540798	2e-08	Y2fK4q	697828	chronotype	4.51498859126095e-05	31.5081868778955
rs17682747	17	61181112	G	A	0.767481	-0.0305453	0.00534573	8.7e-09	Y2fK4q	697828	chronotype	4.67849360281229e-05	32.6492722628751
rs2949923	17	65475228	A	G	0.538655	-0.0265539	0.0045291	4.2e-09	Y2fK4q	697828	chronotype	4.92564408556307e-05	34.3741182432436
rs62082401	18	5186019	C	G	0.809399	-0.0433691000000001	0.00574168	1.2e-14	Y2fK4q	697828	chronotype	8.17521067858277e-05	57.0534099063861
rs4239386	18	31664710	T	A	0.665044	0.0343167999999999	0.00478623	4.2e-13	Y2fK4q	697828	chronotype	7.36624322044078e-05	51.4073472057014
rs12969848	18	38152835	C	T	0.470293	-0.0362004	0.00452995	2.6e-15	Y2fK4q	697828	chronotype	9.15064670060689e-05	63.8614355793248
rs9962650	18	53574043	C	G	0.576796	-0.0263905	0.00457013	5.8e-09	Y2fK4q	697828	chronotype	4.77825128832886e-05	33.3454731657949
rs9964420	18	56824041	C	A	0.695679	0.0406116999999999	0.0049227	2.4e-16	Y2fK4q	697828	chronotype	9.75225059470809e-05	68.0603776536122
rs11152350	18	60240352	A	C	0.470982	-0.0279869	0.00451706	6.4e-10	Y2fK4q	697828	chronotype	5.50079666583573e-05	38.3881009927143
rs9636202	19	18449238	G	A	0.733926	0.0281132000000001	0.00512565	2.7e-08	Y2fK4q	697828	chronotype	4.31077699267908e-05	30.0830194688147
rs11670534	19	47003906	C	T	0.834403	0.0328734	0.00608396	4.7e-08	Y2fK4q	697828	chronotype	4.18359839303713e-05	29.1954587429381
rs78095690	20	16239683	T	C	0.564251	-0.0275925	0.00456112	1.1e-09	Y2fK4q	697828	chronotype	5.2440634661146e-05	36.5963574592603
rs2072727	20	43538733	T	C	0.4361	0.0278367	0.0045507	5.6e-10	Y2fK4q	697828	chronotype	5.36176046562578e-05	37.41776483778
rs139911	22	40704052	C	T	0.42411	0.0377065000000001	0.00457846	2.2e-16	Y2fK4q	697828	chronotype	9.71858405059729e-05	67.8253980052339
rs4822107	22	42704834	G	A	0.494268	-0.0278435	0.00453576	8.7e-10	Y2fK4q	697828	chronotype	5.39977515470139e-05	37.6830697720856

## Sheet: Table S2
Table S2. SNPs included for chronotype in the Estonian Database
SNP	chr.exposure	pos.exposure	effect_allele.exposure	other_allele.exposure	eaf.exposure	beta.exposure	se.exposure	pval.exposure	id.exposure	samplesize.exposure	exposure	r2	F	pval.outcome	chr.outcome	pos.outcome	effect_allele.outcome	other_allele.outcome	eaf.outcome	beta.outcome	se.outcome	outcome	mr_keep.outcome	pval_origin.outcome	id.outcome	samplesize.outcome	proxy.outcome	target_snp.outcome	proxy_snp.outcome	meanF	minF	maxF
rs17374439	1	7888438	C	T	0.803508	-0.0555478	0.00566145	1.2e-22	Y2fK4q	697828	chronotype	0.000137934	96.2669	0.7327	1	7888438	T	C	0.2036	0.004	0.0116	acne vulgaris	TRUE	reported	RJDyJS	399413				45.667	29.0188	168.522
rs3767240	1	21163921	T	C	0.6179	-0.0312547	0.00462739	7.3e-12	Y2fK4q	697828	chronotype	6.53705e-05	45.6202	0.1678	1	21163921	C	T	0.4546	0.013	0.0094	acne vulgaris	TRUE	reported	RJDyJS	399413				45.667	29.0188	168.522
rs12140153	1	62579891	G	T	0.904974	0.0484879	0.00787657	4.8e-10	Y2fK4q	697828	chronotype	5.43026e-05	37.8958																	45.667	29.0188	168.522
rs7547493	1	77775233	A	G	0.82194	-0.0582789	0.00587503	2.5e-23	Y2fK4q	697828	chronotype	0.000140991	98.4014	0.2119	1	77775233	G	A	0.1751	0.0157	0.0126	acne vulgaris	TRUE	reported	RJDyJS	399413				45.667	29.0188	168.522
rs11588913	1	79963816	G	A	0.601488	0.0252376	0.00459169	2.5e-08	Y2fK4q	697828	chronotype	4.32896e-05	30.2099	0.6814	1	79963816	A	G	0.3305	-0.0041	0.0101	acne vulgaris	TRUE	reported	RJDyJS	399413				45.667	29.0188	168.522
rs72720396	1	91191582	A	G	0.769471	-0.0430894	0.00533877	5.3e-16	Y2fK4q	697828	chronotype	9.33404e-05	65.1414	0.4517	1	91191582	G	A	0.2002	-0.009	0.012	acne vulgaris	TRUE	reported	RJDyJS	399413				45.667	29.0188	168.522
rs6656331	1	96971019	C	T	0.475922	0.0271244	0.00451193	1.5e-09	Y2fK4q	697828	chronotype	5.17875e-05	36.1405	0.1769	1	96971019	T	C	0.5433	-0.0127	0.0094	acne vulgaris	TRUE	reported	RJDyJS	399413				45.667	29.0188	168.522
rs17575798	1	110086451	G	A	0.806886	0.0392352	0.00568886	7.8e-12	Y2fK4q	697828	chronotype	6.8159e-05	47.5664	0.8928	1	110086451	A	G	0.2171	0.0015	0.0114	acne vulgaris	TRUE	reported	RJDyJS	399413				45.667	29.0188	168.522
rs6537834	1	115108870	T	C	0.385278	-0.0252152	0.00462393	3.5e-08	Y2fK4q	697828	chronotype	4.26123e-05	29.7373	0.8297	1	115108870	C	T	0.6199	-0.0021	0.0097	acne vulgaris	TRUE	reported	RJDyJS	399413				45.667	29.0188	168.522
rs11587758	1	150327106	G	A	0.604254	-0.0346078	0.00459127	3.8e-14	Y2fK4q	697828	chronotype	8.14139e-05	56.8174	0.01107	1	150327106	A	G	0.406	-0.0243	0.0096	acne vulgaris	TRUE	reported	RJDyJS	399413				45.667	29.0188	168.522
rs75650221	1	174421994	C	T	0.961665	-0.0646983	0.011744	3.3e-08	Y2fK4q	697828	chronotype	4.34897e-05	30.3496	0.6174	1	174421994	T	C	0.0379	-0.0123	0.0246	acne vulgaris	TRUE	reported	RJDyJS	399413				45.667	29.0188	168.522
rs11580135	1	179417780	T	C	0.317102	-0.0275921	0.00483431	1.3e-08	Y2fK4q	697828	chronotype	4.66801e-05	32.5761	0.4464	1	179417780	C	T	0.6791	-0.0077	0.0101	acne vulgaris	TRUE	reported	RJDyJS	399413				45.667	29.0188	168.522
rs1144566	1	182569626	T	C	0.0301951	0.170568	0.0131392	2.8e-38	Y2fK4q	697828	chronotype	0.000241437	168.522	0.615	1	182569626	C	T	0.9752	-0.0156	0.0311	acne vulgaris	TRUE	reported	RJDyJS	399413				45.667	29.0188	168.522
rs10196909	2	4651199	C	A	0.481825	0.0321137	0.00450856	6.2e-13	Y2fK4q	697828	chronotype	7.26984e-05	50.7345	0.8475	2	4651199	A	C	0.4885	-0.0018	0.0094	acne vulgaris	TRUE	reported	RJDyJS	399413				45.667	29.0188	168.522
rs75120545	2	44271496	C	T	0.969822	-0.0974698	0.013897	2.9e-12	Y2fK4q	697828	chronotype	7.04886e-05	49.1923	0.7556	2	44271496	T	C	0.0266	-0.0095	0.0306	acne vulgaris	TRUE	reported	RJDyJS	399413				45.667	29.0188	168.522
rs786406	2	44735953	A	G	0.297822	-0.0327319	0.00492279	1e-11	Y2fK4q	697828	chronotype	6.33496e-05	44.2098	0.6555	2	44735953	G	A	0.6645	0.0045	0.0102	acne vulgaris	TRUE	reported	RJDyJS	399413				45.667	29.0188	168.522
rs10495976	2	49750698	A	T	0.609803	-0.0280661	0.00464114	8e-10	Y2fK4q	697828	chronotype	5.24015e-05	36.569	0.8116	2	49750698	T	A	0.4005	0.0023	0.0097	acne vulgaris	TRUE	reported	RJDyJS	399413				45.667	29.0188	168.522
rs7602425	2	50460480	C	T	0.924493	-0.0536212	0.00854512	3.2e-10	Y2fK4q	697828	chronotype	5.6424e-05	39.3764	0.1925	2	50460480	T	C	0.0468	0.029	0.0223	acne vulgaris	TRUE	reported	RJDyJS	399413				45.667	29.0188	168.522
rs778147	2	61606566	C	A	0.366787	0.0296842	0.00466945	4.6e-10	Y2fK4q	697828	chronotype	5.7909e-05	40.4127	0.1436	2	61606566	A	C	0.6181	0.0141	0.0097	acne vulgaris	TRUE	reported	RJDyJS	399413				45.667	29.0188	168.522
rs6744983	2	76346385	G	T	0.62256	-0.0253244	0.00464336	4.9e-08	Y2fK4q	697828	chronotype	4.26233e-05	29.7449	0.1238	2	76346385	T	G	0.3486	0.0151	0.0098	acne vulgaris	TRUE	reported	RJDyJS	399413				45.667	29.0188	168.522
rs10520176	2	77217310	T	C	0.501844	0.0333663	0.00451125	2e-13	Y2fK4q	697828	chronotype	7.83862e-05	54.7042																	45.667	29.0188	168.522
rs28380327	2	144232491	A	T	0.629168	0.0289857	0.0046586	7.8e-10	Y2fK4q	697828	chronotype	5.54733e-05	38.7129	0.414	2	144232491	T	A	0.3202	-0.0083	0.0101	acne vulgaris	TRUE	reported	RJDyJS	399413				45.667	29.0188	168.522
rs1947198	2	149390435	C	T	0.87783	-0.0396714	0.00686993	3.2e-09	Y2fK4q	697828	chronotype	4.77839e-05	33.3464	0.4127	2	149390435	T	C	0.1177	-0.0121	0.0147	acne vulgaris	TRUE	reported	RJDyJS	399413				45.667	29.0188	168.522
rs11679484	2	198921604	C	A	0.626068	-0.0298469	0.00467197	1.6e-10	Y2fK4q	697828	chronotype	5.84823e-05	40.8129	0.3772	2	198921604	A	C	0.3675	0.0086	0.0097	acne vulgaris	TRUE	reported	RJDyJS	399413	TRUE	rs11679484	rs7573001	45.667	29.0188	168.522
rs138964083	2	206908054	C	T	0.941426	-0.0591602	0.00960026	1e-09	Y2fK4q	697828	chronotype	5.44153e-05	37.9745	0.7464	2	206908054	T	C	0.0388	0.0079	0.0243	acne vulgaris	TRUE	reported	RJDyJS	399413				45.667	29.0188	168.522
rs77008212	2	239307113	A	G	0.912884	0.0825698	0.00798588	1.1e-24	Y2fK4q	697828	chronotype	0.000153173	106.904	0.7244	2	239307113	G	A	0.0849	-0.006	0.0171	acne vulgaris	TRUE	reported	RJDyJS	399413				45.667	29.0188	168.522
rs114870822	2	239353793	G	A	0.987205	-0.108373	0.0201178	3.4e-08	Y2fK4q	697828	chronotype	4.15829e-05	29.0188	0.06268	2	239353793	A	G	0.0291	-0.0548	0.0295	acne vulgaris	TRUE	reported	RJDyJS	399413				45.667	29.0188	168.522
rs34581681	3	2435647	G	A	0.839317	0.034486	0.00617986	4.2e-08	Y2fK4q	697828	chronotype	4.46232e-05	31.1406	0.2592	3	2435647	A	G	0.142	0.0154	0.0137	acne vulgaris	TRUE	reported	RJDyJS	399413				45.667	29.0188	168.522
rs149611468	3	8817423	T	C	0.98802	0.119935	0.0211151	1.3e-08	Y2fK4q	697828	chronotype	4.62314e-05	32.263	0.1884	3	8817423	C	T	0.023	-0.0433	0.0329	acne vulgaris	TRUE	reported	RJDyJS	399413				45.667	29.0188	168.522
rs13059636	3	24935790	A	G	0.528035	-0.0317863	0.0045329	3.5e-12	Y2fK4q	697828	chronotype	7.0461e-05	49.173	0.19	3	24935790	G	A	0.4817	0.0124	0.0094	acne vulgaris	TRUE	reported	RJDyJS	399413	TRUE	rs13059636	rs13095194	45.667	29.0188	168.522
rs115774037	3	36834668	T	C	0.973872	-0.078752	0.0140393	3.5e-08	Y2fK4q	697828	chronotype	4.50883e-05	31.4652	0.8613	3	36834668	C	T	0.0223	0.0056	0.0322	acne vulgaris	TRUE	reported	RJDyJS	399413	TRUE	rs115774037	rs114848860	45.667	29.0188	168.522
rs11712056	3	49914397	T	C	0.556466	0.031956	0.0045329	3.7e-12	Y2fK4q	697828	chronotype	7.12153e-05	49.6994	0.789	3	49914397	C	T	0.3955	-0.0026	0.0096	acne vulgaris	TRUE	reported	RJDyJS	399413				45.667	29.0188	168.522
rs60194061	3	77301121	G	A	0.73032	-0.0326372	0.00511118	8.6e-11	Y2fK4q	697828	chronotype	5.84265e-05	40.7739	0.1895	3	77301121	A	G	0.2027	0.0154	0.0117	acne vulgaris	TRUE	reported	RJDyJS	399413	TRUE	rs60194061	rs58093695	45.667	29.0188	168.522
rs957501	3	85791657	T	A	0.336033	0.0263167	0.00477453	3e-08	Y2fK4q	697828	chronotype	4.35346e-05	30.3809	0.8742	3	85791657	A	T	0.6572	-0.0016	0.0099	acne vulgaris	TRUE	reported	RJDyJS	399413				45.667	29.0188	168.522
rs13065394	3	132971327	G	T	0.711759	0.0297983	0.00497014	2.2e-09	Y2fK4q	697828	chronotype	5.1508e-05	35.9455	0.1375	3	132971327	T	G	0.2887	-0.0153	0.0103	acne vulgaris	TRUE	reported	RJDyJS	399413				45.667	29.0188	168.522
rs2102506	3	156342849	G	A	0.3605	0.0293301	0.00472786	8.3e-10	Y2fK4q	697828	chronotype	5.51475e-05	38.4855	0.645	3	156342849	A	G	0.6117	0.0045	0.0099	acne vulgaris	TRUE	reported	RJDyJS	399413				45.667	29.0188	168.522
rs3850174	3	172364093	T	A	0.742864	0.0318495	0.00519636	1.4e-09	Y2fK4q	697828	chronotype	5.38313e-05	37.5669	0.4229	3	172364093	A	T	0.2246	0.0092	0.0114	acne vulgaris	TRUE	reported	RJDyJS	399413				45.667	29.0188	168.522
rs2239626	3	185998884	T	C	0.695468	-0.0335827	0.00490904	5e-12	Y2fK4q	697828	chronotype	6.70595e-05	46.799	0.7297	3	185998884	C	T	0.2426	-0.0038	0.0109	acne vulgaris	TRUE	reported	RJDyJS	399413	TRUE	rs2239626	rs4686419	45.667	29.0188	168.522
rs34627176	4	1006200	G	A	0.786135	-0.0298813	0.00551285	3.6e-08	Y2fK4q	697828	chronotype	4.20998e-05	29.3796	0.4479	4	1006200	A	G	0.1634	-0.0098	0.0129	acne vulgaris	TRUE	reported	RJDyJS	399413				45.667	29.0188	168.522
rs231398	4	2832189	G	A	0.837855	0.0354509	0.00615616	5.8e-09	Y2fK4q	697828	chronotype	4.75188e-05	33.1614	0.4295	4	2832189	A	G	0.2091	-0.0092	0.0116	acne vulgaris	TRUE	reported	RJDyJS	399413				45.667	29.0188	168.522
rs12498561	4	21860763	C	G	0.495316	-0.0246853	0.00451296	4.6e-08	Y2fK4q	697828	chronotype	4.28733e-05	29.9194	0.8627	4	21860763	G	C	0.5178	-0.0017	0.0097	acne vulgaris	TRUE	reported	RJDyJS	399413				45.667	29.0188	168.522
rs28634184	4	62873419	C	T	0.749415	0.0299077	0.00521122	1.3e-08	Y2fK4q	697828	chronotype	4.71974e-05	32.9371	0.2234	4	62873419	T	C	0.2092	-0.0141	0.0115	acne vulgaris	TRUE	reported	RJDyJS	399413				45.667	29.0188	168.522
rs7691121	4	83274208	C	G	0.767925	0.0340511	0.00532954	1e-10	Y2fK4q	697828	chronotype	5.84937e-05	40.8208	0.7918	4	83274208	G	C	0.2771	-0.0028	0.0105	acne vulgaris	TRUE	reported	RJDyJS	399413				45.667	29.0188	168.522
rs4339281	4	118315560	A	G	0.872986	0.0394057	0.00677257	5.3e-09	Y2fK4q	697828	chronotype	4.85112e-05	33.854	0.5732	4	118315560	G	A	0.1298	-0.0079	0.0139	acne vulgaris	TRUE	reported	RJDyJS	399413				45.667	29.0188	168.522
rs4241964	4	137053959	T	G	0.525037	-0.0326407	0.00453345	7.2e-13	Y2fK4q	697828	chronotype	7.42815e-05	51.8394	0.1534	4	137053959	G	T	0.4998	-0.0135	0.0095	acne vulgaris	TRUE	reported	RJDyJS	399413	TRUE	rs4241964	rs1724551	45.667	29.0188	168.522
rs10067113	5	26016363	C	T	0.380528	-0.0280609	0.00465694	2.5e-09	Y2fK4q	697828	chronotype	5.20273e-05	36.3079	0.9195	5	26016363	T	C	0.6074	-0.001	0.0096	acne vulgaris	TRUE	reported	RJDyJS	399413				45.667	29.0188	168.522
rs7701529	5	63861475	A	T	0.237701	-0.0300077	0.00532109	1.7e-08	Y2fK4q	697828	chronotype	4.55718e-05	31.8026	0.2391	5	63861475	T	A	0.8019	0.0141	0.0119	acne vulgaris	TRUE	reported	RJDyJS	399413				45.667	29.0188	168.522
rs34875688	5	88182026	T	A	0.767268	0.0320299	0.00534073	1.1e-09	Y2fK4q	697828	chronotype	5.15394e-05	35.9674	0.8709	5	88182026	A	T	0.2179	0.0018	0.0113	acne vulgaris	TRUE	reported	RJDyJS	399413				45.667	29.0188	168.522
rs12055234	5	104037760	G	A	0.67152	-0.0271463	0.00480045	1.5e-08	Y2fK4q	697828	chronotype	4.58236e-05	31.9784	0.7103	5	104037760	A	G	0.6911	0.0038	0.0103	acne vulgaris	TRUE	reported	RJDyJS	399413	TRUE	rs12055234	rs6421926	45.667	29.0188	168.522
rs1027742	5	115904410	A	G	0.738161	0.0306919	0.00514017	3.6e-09	Y2fK4q	697828	chronotype	5.10884e-05	35.6526	0.3264	5	115904410	G	A	0.2695	0.0105	0.0107	acne vulgaris	TRUE	reported	RJDyJS	399413				45.667	29.0188	168.522
rs2910032	5	152540354	C	T	0.482294	-0.0336963	0.00451163	1.1e-13	Y2fK4q	697828	chronotype	7.99308e-05	55.7823	0.7612	5	152540354	T	C	0.5453	0.0028	0.0094	acne vulgaris	TRUE	reported	RJDyJS	399413				45.667	29.0188	168.522
rs7735794	5	175339984	G	A	0.775914	-0.0313895	0.00570769	4.5e-08	Y2fK4q	697828	chronotype	4.33392e-05	30.2445	0.08917	5	175339984	A	G	0.2275	0.0202	0.0119	acne vulgaris	TRUE	reported	RJDyJS	399413				45.667	29.0188	168.522
rs9369915	6	13191447	G	A	0.694286	-0.0371942	0.00491617	3e-14	Y2fK4q	697828	chronotype	8.20187e-05	57.2394	0.5757	6	13191447	A	G	0.3652	-0.0054	0.0097	acne vulgaris	TRUE	reported	RJDyJS	399413	TRUE	rs9369915	rs9369917	45.667	29.0188	168.522
rs2842638	6	41583576	T	G	0.576697	0.0306548	0.0046083	1.9e-11	Y2fK4q	697828	chronotype	6.34073e-05	44.2501	0.5222	6	41583576	G	T	0.4434	0.0061	0.0095	acne vulgaris	TRUE	reported	RJDyJS	399413				45.667	29.0188	168.522
rs2653343	6	55133326	T	A	0.214721	0.0613434	0.00549376	5.2e-29	Y2fK4q	697828	chronotype	0.000178637	124.68	0.9734	6	55133326	A	T	0.8083	-0.0004	0.012	acne vulgaris	TRUE	reported	RJDyJS	399413				45.667	29.0188	168.522
rs60616179	6	110244765	A	G	0.945063	0.0562524	0.009965	9.2e-09	Y2fK4q	697828	chronotype	4.56625e-05	31.8659	0.8335	6	110244765	G	A	0.0633	-0.0041	0.0195	acne vulgaris	TRUE	reported	RJDyJS	399413				45.667	29.0188	168.522
rs520954	6	153135378	A	G	0.672827	-0.0422581	0.00479665	1.6e-18	Y2fK4q	697828	chronotype	0.000111211	77.6145	0.5239	6	153135378	G	A	0.3204	0.0064	0.01	acne vulgaris	TRUE	reported	RJDyJS	399413				45.667	29.0188	168.522
rs3877930	6	153574103	A	G	0.986059	-0.112315	0.0192049	3e-09	Y2fK4q	697828	chronotype	4.90097e-05	34.2019																	45.667	29.0188	168.522
rs9365769	6	165186963	A	G	0.436791	0.0262836	0.00457414	7.3e-09	Y2fK4q	697828	chronotype	4.73131e-05	33.0179	0.5262	6	165186963	G	G	0.5991	-0.0061	0.0096	acne vulgaris	TRUE	reported	RJDyJS	399413	TRUE	rs9365769	rs9365767	45.667	29.0188	168.522
rs1494185	7	24087655	G	A	0.725563	0.028783	0.00505302	1.1e-08	Y2fK4q	697828	chronotype	4.64945e-05	32.4466	0.3629	7	24087655	A	G	0.3041	0.0093	0.0102	acne vulgaris	TRUE	reported	RJDyJS	399413				45.667	29.0188	168.522
rs12669911	7	32262377	A	C	0.384427	-0.0294686	0.00466454	1.8e-10	Y2fK4q	697828	chronotype	5.71911e-05	39.9117	0.3602	7	32262377	C	A	0.6732	-0.0092	0.01	acne vulgaris	TRUE	reported	RJDyJS	399413				45.667	29.0188	168.522
rs6967481	7	50642701	C	T	0.50325	-0.029923	0.00452547	1.9e-11	Y2fK4q	697828	chronotype	6.2648e-05	43.7201	0.8936	7	50642701	T	C	0.4488	-0.0013	0.0095	acne vulgaris	TRUE	reported	RJDyJS	399413				45.667	29.0188	168.522
rs202157	7	101637753	C	T	0.29887	0.0397113	0.00493645	1.3e-15	Y2fK4q	697828	chronotype	9.27278e-05	64.7139	0.1845	7	101637753	T	C	0.73	-0.014	0.0106	acne vulgaris	TRUE	reported	RJDyJS	399413				45.667	29.0188	168.522
rs4729854	7	102383663	T	A	0.516577	0.0443063	0.00461134	1.9e-21	Y2fK4q	697828	chronotype	0.000132273	92.3157	0.4613	7	102383663	A	T	0.472	-0.0072	0.0098	acne vulgaris	TRUE	reported	RJDyJS	399413				45.667	29.0188	168.522
rs1524472	7	115676877	A	G	0.440956	0.0252952	0.00453478	2.1e-08	Y2fK4q	697828	chronotype	4.45857e-05	31.1145	0.7528	7	115676877	G	A	0.5468	0.003	0.0095	acne vulgaris	TRUE	reported	RJDyJS	399413				45.667	29.0188	168.522
rs13269289	8	4843924	G	A	0.673433	-0.0275791	0.00485097	5.5e-09	Y2fK4q	697828	chronotype	4.63164e-05	32.3223	0.3415	8	4843924	A	G	0.3185	-0.0096	0.01	acne vulgaris	TRUE	reported	RJDyJS	399413	TRUE	rs13269289	rs13275884	45.667	29.0188	168.522
rs11786306	8	8208759	G	C	0.646069	-0.0292175	0.00474691	7e-10	Y2fK4q	697828	chronotype	5.42865e-05	37.8846	0.1394	8	8208759	C	G	0.3224	-0.015	0.0102	acne vulgaris	TRUE	reported	RJDyJS	399413	TRUE	rs11786306	rs34796521	45.667	29.0188	168.522
rs13255030	8	31671330	A	G	0.58516	0.026079	0.00457953	1.5e-08	Y2fK4q	697828	chronotype	4.64699e-05	32.4294	0.996	8	31671330	G	A	0.4091	0	0.0095	acne vulgaris	TRUE	reported	RJDyJS	399413				45.667	29.0188	168.522
rs7001604	8	33680979	T	C	0.613053	-0.0318374	0.00465169	7.3e-12	Y2fK4q	697828	chronotype	6.71237e-05	46.8438	0.1711	8	33680979	C	T	0.3038	0.014	0.0102	acne vulgaris	TRUE	reported	RJDyJS	399413				45.667	29.0188	168.522
rs769066	8	53145698	T	C	0.816231	-0.0329101	0.00583263	1.9e-08	Y2fK4q	697828	chronotype	4.56206e-05	31.8367	0.5666	8	53145698	C	T	0.1792	0.007	0.0123	acne vulgaris	TRUE	reported	RJDyJS	399413				45.667	29.0188	168.522
rs4321976	8	76614958	T	C	0.778752	0.0328285	0.00543138	8.7e-10	Y2fK4q	697828	chronotype	5.23493e-05	36.5326	0.7455	8	76614958	C	T	0.1712	0.004	0.0125	acne vulgaris	TRUE	reported	RJDyJS	399413				45.667	29.0188	168.522
rs1470764	8	101950038	G	A	0.387169	0.0285814	0.00463098	5.9e-10	Y2fK4q	697828	chronotype	5.4582e-05	38.0908	0.7795	8	101950038	A	G	0.5742	-0.0027	0.0095	acne vulgaris	TRUE	reported	RJDyJS	399413				45.667	29.0188	168.522
rs12682033	8	116701130	T	C	0.240285	0.034887	0.00529299	6.1e-11	Y2fK4q	697828	chronotype	6.22515e-05	43.4434	0.7687	8	116701130	C	T	0.7412	0.0032	0.011	acne vulgaris	TRUE	reported	RJDyJS	399413				45.667	29.0188	168.522
rs10976942	9	8310813	C	A	0.917117	-0.0493619	0.00817039	1e-09	Y2fK4q	697828	chronotype	5.23031e-05	36.5003	0.8248	9	8310813	A	C	0.0678	0.0041	0.0187	acne vulgaris	TRUE	reported	RJDyJS	399413				45.667	29.0188	168.522
rs308521	9	37367094	T	C	0.602903	0.0279091	0.00461881	1.5e-09	Y2fK4q	697828	chronotype	5.23191e-05	36.5115	0.9798	9	37367094	C	T	0.2976	-0.0003	0.0103	acne vulgaris	TRUE	reported	RJDyJS	399413				45.667	29.0188	168.522
rs62553781	9	76679777	C	T	0.965073	0.0828273	0.0123021	3e-11	Y2fK4q	697828	chronotype	6.49549e-05	45.3302	0.8893	9	76679777	T	C	0.022	0.0045	0.0326	acne vulgaris	TRUE	reported	RJDyJS	399413				45.667	29.0188	168.522
rs10123584	9	115202610	G	A	0.292722	0.0270426	0.00495784	4e-08	Y2fK4q	697828	chronotype	4.26329e-05	29.7516	0.5961	9	115202610	A	G	0.74	-0.0057	0.0108	acne vulgaris	TRUE	reported	RJDyJS	399413				45.667	29.0188	168.522
rs10818834	9	126317324	T	C	0.733086	0.0323011	0.00511442	4.2e-10	Y2fK4q	697828	chronotype	5.71569e-05	39.8878	0.07701	9	126317324	C	T	0.3212	0.0178	0.0101	acne vulgaris	TRUE	reported	RJDyJS	399413				45.667	29.0188	168.522
rs34619169	9	139327277	G	A	0.692101	-0.0272806	0.00488632	1.5e-08	Y2fK4q	697828	chronotype	4.46659e-05	31.1704	0.1931	9	139327277	A	G	0.3099	0.0132	0.0101	acne vulgaris	TRUE	reported	RJDyJS	399413				45.667	29.0188	168.522
rs28458909	9	140257189	C	T	0.876461	0.0676497	0.00683765	4.7e-23	Y2fK4q	697828	chronotype	0.000140252	97.8851	0.8334	9	140257189	T	C	0.1446	0.0028	0.0135	acne vulgaris	TRUE	reported	RJDyJS	399413				45.667	29.0188	168.522
rs2893787	10	60568697	G	A	0.2553	0.0288453	0.00516506	3.5e-08	Y2fK4q	697828	chronotype	4.46922e-05	31.1888	0.731	10	60568697	A	G	0.7901	0.0042	0.0122	acne vulgaris	TRUE	reported	RJDyJS	399413				45.667	29.0188	168.522
rs4752593	10	123536490	G	C	0.371575	0.0265676	0.00468542	9.8e-09	Y2fK4q	697828	chronotype	4.60722e-05	32.1519	0.9253	10	123536490	C	G	0.6317	-0.0009	0.0098	acne vulgaris	TRUE	reported	RJDyJS	399413				45.667	29.0188	168.522
rs6599694	10	125124884	G	T	0.656185	0.0266711	0.00476984	2.1e-08	Y2fK4q	697828	chronotype	4.48029e-05	31.266	0.6918	10	125124884	T	G	0.3015	0.0041	0.0103	acne vulgaris	TRUE	reported	RJDyJS	399413				45.667	29.0188	168.522
rs72632979	11	16615883	A	G	0.828665	0.0346051	0.00599706	4e-09	Y2fK4q	697828	chronotype	4.77127e-05	33.2968	0.3589	11	16615883	G	A	0.1033	0.0144	0.0157	acne vulgaris	TRUE	reported	RJDyJS	399413				45.667	29.0188	168.522
rs10501087	11	27670108	T	C	0.799452	-0.0346935	0.00562434	5.4e-10	Y2fK4q	697828	chronotype	5.45232e-05	38.0498	0.143	11	27670108	C	C	0.1729	-0.0182	0.0124	acne vulgaris	TRUE	reported	RJDyJS	399413	TRUE	rs10501087	rs16917204	45.667	29.0188	168.522
rs512647	11	30445366	G	C	0.556369	-0.0244887	0.00453866	4.2e-08	Y2fK4q	697828	chronotype	4.17167e-05	29.1122	0.5618	11	30445366	C	G	0.4365	-0.0055	0.0094	acne vulgaris	TRUE	reported	RJDyJS	399413				45.667	29.0188	168.522
rs11032362	11	33759092	G	A	0.909159	-0.0672744	0.0078366	7.3e-18	Y2fK4q	697828	chronotype	0.000105597	73.6959	0.6135	11	33759092	A	G	0.0705	-0.0099	0.0196	acne vulgaris	TRUE	reported	RJDyJS	399413				45.667	29.0188	168.522
rs11229543	11	58370698	G	A	0.759944	0.033727	0.00527519	1.1e-10	Y2fK4q	697828	chronotype	5.85741e-05	40.8769	0.1623	11	58370698	A	G	0.2446	-0.0153	0.0109	acne vulgaris	TRUE	reported	RJDyJS	399413				45.667	29.0188	168.522
rs4936291	11	114009982	A	G	0.610604	-0.0276435	0.00474862	9.4e-09	Y2fK4q	697828	chronotype	4.85603e-05	33.8883	0.9433	11	114009982	G	A	0.3712	0.0007	0.0098	acne vulgaris	TRUE	reported	RJDyJS	399413				45.667	29.0188	168.522
rs73606718	11	122814474	G	A	0.879064	0.040119	0.00691498	5.7e-09	Y2fK4q	697828	chronotype	4.82335e-05	33.6602	0.06753	11	122814474	A	G	0.1188	0.0272	0.0149	acne vulgaris	TRUE	reported	RJDyJS	399413				45.667	29.0188	168.522
rs2467109	12	23064038	T	A	0.718089	-0.0276799	0.00501668	3.9e-08	Y2fK4q	697828	chronotype	4.36243e-05	30.4435	0.9169	12	23064038	A	T	0.2463	-0.0011	0.0109	acne vulgaris	TRUE	reported	RJDyJS	399413				45.667	29.0188	168.522
rs7302062	12	24065752	T	C	0.55303	0.0317771	0.00453388	5.2e-12	Y2fK4q	697828	chronotype	7.03898e-05	49.1233	0.9629	12	24065752	C	T	0.4645	0.0004	0.0094	acne vulgaris	TRUE	reported	RJDyJS	399413				45.667	29.0188	168.522
rs7313852	12	38908389	G	A	0.564644	0.0477061	0.00455758	3.8e-25	Y2fK4q	697828	chronotype	0.000156987	109.567	0.269	12	38908389	A	G	0.4693	0.0104	0.0094	acne vulgaris	TRUE	reported	RJDyJS	399413				45.667	29.0188	168.522
rs11174781	12	63516126	T	C	0.877633	0.0475212	0.00687518	3.9e-12	Y2fK4q	697828	chronotype	6.84587e-05	47.7755	0.8575	12	63516126	C	T	0.1569	-0.0023	0.0129	acne vulgaris	TRUE	reported	RJDyJS	399413				45.667	29.0188	168.522
rs7959983	12	90452978	T	C	0.595837	-0.0318282	0.00457585	4.7e-12	Y2fK4q	697828	chronotype	6.9327e-05	48.3815	0.1493	12	90452978	C	T	0.3927	-0.0138	0.0096	acne vulgaris	TRUE	reported	RJDyJS	399413				45.667	29.0188	168.522
rs7304278	12	106989915	A	G	0.274962	-0.0327762	0.00506843	9.6e-11	Y2fK4q	697828	chronotype	5.99233e-05	41.8186	0.6625	12	106989915	G	A	0.6819	0.0044	0.0101	acne vulgaris	TRUE	reported	RJDyJS	399413				45.667	29.0188	168.522
rs9597241	13	56281271	A	C	0.811186	0.0322479	0.00579356	2.7e-08	Y2fK4q	697828	chronotype	4.4396e-05	30.9821	0.05959	13	56281271	C	A	0.2071	-0.0218	0.0116	acne vulgaris	TRUE	reported	RJDyJS	399413				45.667	29.0188	168.522
rs9573971	13	77568732	A	G	0.966149	0.108483	0.0124737	4.9e-18	Y2fK4q	697828	chronotype	0.000108377	75.6365	0.9045	13	77568732	G	A	0.027	0.0035	0.0291	acne vulgaris	TRUE	reported	RJDyJS	399413				45.667	29.0188	168.522
rs11841335	13	94105884	G	A	0.746028	0.0283759	0.00518535	4e-08	Y2fK4q	697828	chronotype	4.29117e-05	29.9462	0.2962	13	94105884	A	G	0.2363	-0.0116	0.0111	acne vulgaris	TRUE	reported	RJDyJS	399413				45.667	29.0188	168.522
rs10149448	14	84253271	A	G	0.603659	0.0272319	0.00461608	5.6e-09	Y2fK4q	697828	chronotype	4.987e-05	34.8023	0.5752	14	84253271	G	A	0.4371	-0.0053	0.0095	acne vulgaris	TRUE	reported	RJDyJS	399413				45.667	29.0188	168.522
rs12927162	16	52684916	A	G	0.721652	0.0459823	0.00503141	2e-20	Y2fK4q	697828	chronotype	0.000119674	83.522	0.03911	16	52684916	G	A	0.3142	0.0218	0.0106	acne vulgaris	TRUE	reported	RJDyJS	399413				45.667	29.0188	168.522
rs1421085	16	53800954	T	C	0.59687	-0.0416273	0.00459528	1.8e-19	Y2fK4q	697828	chronotype	0.00011758	82.06	0.008764	16	53800954	C	T	0.4457	0.0246	0.0094	acne vulgaris	TRUE	reported	RJDyJS	399413	TRUE	rs1421085	rs11642015	45.667	29.0188	168.522
rs62046253	16	60644621	C	T	0.655839	-0.0299674	0.00473879	1.4e-10	Y2fK4q	697828	chronotype	5.73047e-05	39.991	0.6537	16	60644621	T	C	0.3543	0.0044	0.0098	acne vulgaris	TRUE	reported	RJDyJS	399413				45.667	29.0188	168.522
rs11645898	16	72229532	T	C	0.832897	0.0356701	0.00604233	1.8e-09	Y2fK4q	697828	chronotype	4.99378e-05	34.8497	0.5307	16	72229532	C	T	0.1956	-0.0074	0.0119	acne vulgaris	TRUE	reported	RJDyJS	399413				45.667	29.0188	168.522
rs2518022	17	8057367	T	C	0.0835266	0.0626693	0.00813849	7.6e-15	Y2fK4q	697828	chronotype	8.49643e-05	59.2954	0.9802	17	8057367	C	T	0.9371	-0.0005	0.0198	acne vulgaris	TRUE	reported	RJDyJS	399413				45.667	29.0188	168.522
rs3760185	17	17401736	C	T	0.751597	0.0371222	0.00527711	2.1e-12	Y2fK4q	697828	chronotype	7.09081e-05	49.485	0.4595	17	17401736	T	C	0.2344	-0.0082	0.011	acne vulgaris	TRUE	reported	RJDyJS	399413				45.667	29.0188	168.522
rs72829936	17	34060115	G	A	0.836049	-0.0352298	0.00610979	5.5e-09	Y2fK4q	697828	chronotype	4.7643e-05	33.2481	0.6807	17	34060115	A	G	0.1636	-0.0053	0.0128	acne vulgaris	TRUE	reported	RJDyJS	399413				45.667	29.0188	168.522
rs35653190	17	46077967	C	T	0.771778	0.0303562	0.00540798	2e-08	Y2fK4q	697828	chronotype	4.51499e-05	31.5082	0.8471	17	46077967	T	C	0.2041	0.0022	0.0117	acne vulgaris	TRUE	reported	RJDyJS	399413				45.667	29.0188	168.522
rs17682747	17	61181112	G	A	0.767481	-0.0305453	0.00534573	8.7e-09	Y2fK4q	697828	chronotype	4.67849e-05	32.6493	0.0757	17	61181112	A	G	0.2753	0.0187	0.0105	acne vulgaris	TRUE	reported	RJDyJS	399413				45.667	29.0188	168.522
rs2949923	17	65475228	A	G	0.538655	-0.0265539	0.0045291	4.2e-09	Y2fK4q	697828	chronotype	4.92564e-05	34.3741	0.7669	17	65475228	G	A	0.4057	-0.0028	0.0095	acne vulgaris	TRUE	reported	RJDyJS	399413				45.667	29.0188	168.522
rs62082401	18	5186019	C	G	0.809399	-0.0433691	0.00574168	1.2e-14	Y2fK4q	697828	chronotype	8.17521e-05	57.0534	0.4067	18	5186019	G	C	0.1961	0.0109	0.0131	acne vulgaris	TRUE	reported	RJDyJS	399413				45.667	29.0188	168.522
rs4239386	18	31664710	T	A	0.665044	0.0343168	0.00478623	4.2e-13	Y2fK4q	697828	chronotype	7.36624e-05	51.4073	0.7922	18	31664710	A	T	0.3749	0.0026	0.0097	acne vulgaris	TRUE	reported	RJDyJS	399413				45.667	29.0188	168.522
rs12969848	18	38152835	C	T	0.470293	-0.0362004	0.00452995	2.6e-15	Y2fK4q	697828	chronotype	9.15065e-05	63.8614	0.725	18	38152835	T	C	0.5339	-0.0033	0.0095	acne vulgaris	TRUE	reported	RJDyJS	399413				45.667	29.0188	168.522
rs9962650	18	53574043	C	G	0.576796	-0.0263905	0.00457013	5.8e-09	Y2fK4q	697828	chronotype	4.77825e-05	33.3455	0.8063	18	53574043	G	C	0.3898	-0.0024	0.0097	acne vulgaris	TRUE	reported	RJDyJS	399413				45.667	29.0188	168.522
rs9964420	18	56824041	C	A	0.695679	0.0406117	0.0049227	2.4e-16	Y2fK4q	697828	chronotype	9.75225e-05	68.0604	0.1963	18	56824041	A	C	0.2708	0.0136	0.0105	acne vulgaris	TRUE	reported	RJDyJS	399413				45.667	29.0188	168.522
rs11152350	18	60240352	A	C	0.470982	-0.0279869	0.00451706	6.4e-10	Y2fK4q	697828	chronotype	5.5008e-05	38.3881	0.102	18	60240352	C	A	0.5958	-0.0156	0.0096	acne vulgaris	TRUE	reported	RJDyJS	399413				45.667	29.0188	168.522
rs9636202	19	18449238	G	A	0.733926	0.0281132	0.00512565	2.7e-08	Y2fK4q	697828	chronotype	4.31078e-05	30.083	0.9289	19	18449238	A	G	0.2466	-0.001	0.0109	acne vulgaris	TRUE	reported	RJDyJS	399413				45.667	29.0188	168.522
rs11670534	19	47003906	C	T	0.834403	0.0328734	0.00608396	4.7e-08	Y2fK4q	697828	chronotype	4.1836e-05	29.1955	0.7967	19	47003906	T	C	0.1462	-0.0034	0.0133	acne vulgaris	TRUE	reported	RJDyJS	399413				45.667	29.0188	168.522
rs78095690	20	16239683	T	C	0.564251	-0.0275925	0.00456112	1.1e-09	Y2fK4q	697828	chronotype	5.24406e-05	36.5964	0.1096	20	16239683	C	T	0.3985	-0.0153	0.0096	acne vulgaris	TRUE	reported	RJDyJS	399413	TRUE	rs78095690	rs1329827	45.667	29.0188	168.522
rs2072727	20	43538733	T	C	0.4361	0.0278367	0.0045507	5.6e-10	Y2fK4q	697828	chronotype	5.36176e-05	37.4178	0.4283	20	43538733	C	T	0.5653	0.0075	0.0095	acne vulgaris	TRUE	reported	RJDyJS	399413				45.667	29.0188	168.522
rs139911	22	40704052	C	T	0.42411	0.0377065	0.00457846	2.2e-16	Y2fK4q	697828	chronotype	9.71858e-05	67.8254	0.09972	22	40704052	T	C	0.5906	0.0158	0.0096	acne vulgaris	TRUE	reported	RJDyJS	399413				45.667	29.0188	168.522
rs4822107	22	42704834	G	A	0.494268	-0.0278435	0.00453576	8.7e-10	Y2fK4q	697828	chronotype	5.39978e-05	37.6831	0.693	22	42704834	A	G	0.456	0.0038	0.0095	acne vulgaris	TRUE	reported	RJDyJS	399413				45.667	29.0188	168.522

## Sheet: Table S3
Table S3. SNPs included for daytime sleepiness in the FinnGen Database
SNP	chr.exposure	pos.exposure	effect_allele.exposure	other_allele.exposure	eaf.exposure	beta.exposure	se.exposure	pval.exposure	id.exposure	samplesize.exposure	exposure	r2	F
rs12140153	1	62579891	G	T	0.904572	0.015256	0.00179131	1.5e-17	mSTlyh	452071	DaytimeSleepiness	0.000160421855468606	72.5333837198368
rs553314	1	90967306	T	C	0.365253	0.00635973	0.00107298	3.7e-09	mSTlyh	452071	DaytimeSleepiness	7.77058482754713e-05	35.1311350186915
rs57746981	1	201885234	C	T	0.644468	0.0063061	0.00107274	3.8e-09	mSTlyh	452071	DaytimeSleepiness	7.64351130591743e-05	34.556586462141
rs825127	1	223506788	T	G	0.530794	0.00577086	0.00102973	2e-08	mSTlyh	452071	DaytimeSleepiness	6.94700363459449e-05	31.4074317362992
rs4665972	2	27598097	T	C	0.393644	0.00702837	0.00105545	2.7e-11	mSTlyh	452071	DaytimeSleepiness	9.80809486681167e-05	44.3437056561651
rs7598712	2	46660452	G	T	0.555254	0.00564357	0.00103885	4.4e-08	mSTlyh	452071	DaytimeSleepiness	6.52780458570134e-05	29.5121074052347
rs6741951	2	58959112	G	A	0.710788	0.0076996	0.00113785	1.4e-11	mSTlyh	452071	DaytimeSleepiness	0.000101278127902824	45.7893394614805
rs11123962	2	104157011	T	G	0.553234	-0.00760762	0.00103139	1.6e-13	mSTlyh	452071	DaytimeSleepiness	0.000120335253720345	54.4063848202242
rs7607363	2	213402705	A	G	0.561234	-0.00654917	0.0010354	3.1e-10	mSTlyh	452071	DaytimeSleepiness	8.84934494379521e-05	40.0086857005707
rs13010456	2	236792801	A	G	0.594693	0.00734809	0.00104819	2.9e-12	mSTlyh	452071	DaytimeSleepiness	0.000108696372969381	49.1436023632265
rs9821366	3	84561063	A	G	0.271013	0.00771163	0.00115503	3.5e-11	mSTlyh	452071	DaytimeSleepiness	9.85953356073466e-05	44.5762897869293
rs843372	3	183996213	C	T	0.230053	0.00762125	0.00122243	3.8e-10	mSTlyh	452071	DaytimeSleepiness	8.59726729981486e-05	38.8689219747188
rs6897863	5	92512481	A	C	0.584415	0.00605866	0.00104426	6.9e-09	mSTlyh	452071	DaytimeSleepiness	7.44555184574685e-05	33.6615380608177
rs12153518	5	138501494	A	G	0.47224	0.00679561	0.00102863	3.3e-11	mSTlyh	452071	DaytimeSleepiness	9.65361435119762e-05	43.6452112016878
rs6923811	6	27289776	T	C	0.678973	0.00687507	0.0011019	4.5e-10	mSTlyh	452071	DaytimeSleepiness	8.61044977934079e-05	38.9285261341607
rs55960940	6	38153146	T	C	0.822172	0.00755467	0.00134768	2.3e-08	mSTlyh	452071	DaytimeSleepiness	6.95057277402123e-05	31.4235689518182
rs3122163	6	55056368	C	T	0.231114	0.00920223	0.00122324	3.4e-14	mSTlyh	452071	DaytimeSleepiness	0.000125170448080861	56.592763034974
rs641498	6	124911565	A	G	0.392184	-0.00587812	0.00105586	2.5e-08	mSTlyh	452071	DaytimeSleepiness	6.85532105861045e-05	30.9929060196627
rs62519825	8	65479707	T	C	0.88741	-0.00893208	0.00162354	2.6e-08	mSTlyh	452071	DaytimeSleepiness	6.69489079727762e-05	30.2675522579156
rs285793	8	106087862	G	A	0.461246	0.00657609	0.00103235	2.1e-10	mSTlyh	452071	DaytimeSleepiness	8.97503073064853e-05	40.576973469574
rs7837226	8	131235895	A	G	0.472852	-0.00570998	0.00102965	2.2e-08	mSTlyh	452071	DaytimeSleepiness	6.80226794965198e-05	30.7530366012645
rs13284688	9	81727018	T	C	0.793399	-0.0101903	0.00126801	1.1e-15	mSTlyh	452071	DaytimeSleepiness	0.00014284330615923	64.5842560007497
rs1566362	9	128163132	T	C	0.631731	0.00644926	0.00106555	1.6e-09	mSTlyh	452071	DaytimeSleepiness	8.10270943580029e-05	36.6328057691377
rs7476897	10	92416402	G	A	0.679434	0.00732039	0.0010987	4.6e-11	mSTlyh	452071	DaytimeSleepiness	9.81885611649178e-05	44.39236347956
rs12253139	10	128899947	T	C	0.876007	-0.00851903	0.00155596	4.4e-08	mSTlyh	452071	DaytimeSleepiness	6.63052617374751e-05	29.9765409707937
rs4765939	12	2582397	G	C	0.583272	-0.0062379	0.00104294	2.3e-09	mSTlyh	452071	DaytimeSleepiness	7.91256251833505e-05	35.7730728177635
rs1846644	12	117938380	T	C	0.590849	-0.0113557	0.00104469	1.8e-27	mSTlyh	452071	DaytimeSleepiness	0.000261296025339211	118.154706234186
rs7982022	13	54049003	G	A	0.562517	-0.0057991	0.00105449	4.4e-08	mSTlyh	452071	DaytimeSleepiness	6.68960635292694e-05	30.2436597253957
rs8015449	14	82161860	A	G	0.538612	0.00597228	0.0010316	6.2e-09	mSTlyh	452071	DaytimeSleepiness	7.41342347397344e-05	33.5162740678864
rs2472297	15	75027880	C	T	0.734689	0.00637313	0.00116124	4.8e-08	mSTlyh	452071	DaytimeSleepiness	6.66232780204946e-05	30.1203253862592
rs17356118	15	83237899	A	G	0.76879	-0.00759808	0.00121728	3.2e-10	mSTlyh	452071	DaytimeSleepiness	8.61752744723408e-05	38.9605275895952
rs11078398	17	17697099	G	A	0.743669	0.00731193	0.00123757	3.8e-09	mSTlyh	452071	DaytimeSleepiness	7.72119146149336e-05	34.9078083267743
rs7207582	17	44210933	A	G	0.771994	0.00834668	0.0012248	1.2e-11	mSTlyh	452071	DaytimeSleepiness	0.000102717847839763	46.4403250053112

## Sheet: Table S4
Table S4. SNPs included for daytime sleepiness in the Estonian Database
SNP	chr.exposure	pos.exposure	effect_allele.exposure	other_allele.exposure	eaf.exposure	beta.exposure	se.exposure	pval.exposure	id.exposure	samplesize.exposure	exposure	r2	F	pval.outcome	chr.outcome	pos.outcome	effect_allele.outcome	other_allele.outcome	eaf.outcome	beta.outcome	se.outcome	outcome	mr_keep.outcome	pval_origin.outcome	id.outcome	samplesize.outcome	proxy.outcome	target_snp.outcome	proxy_snp.outcome	meanF	minF	maxF
rs12140153	1	62579891	G	T	0.904572	0.015256	0.00179131	1.5e-17	mSTlyh	452071	DaytimeSleepiness	0.000160422	72.5334																	42.4492	29.5121	118.155
rs553314	1	90967306	T	C	0.365253	0.00635973	0.00107298	3.7e-09	mSTlyh	452071	DaytimeSleepiness	7.77058e-05	35.1311	0.8951	1	90967306	C	T	0.7152	0.0014	0.0105	acne vulgaris	TRUE	reported	RJDyJS	399413				42.4492	29.5121	118.155
rs57746981	1	201885234	C	T	0.644468	0.0063061	0.00107274	3.8e-09	mSTlyh	452071	DaytimeSleepiness	7.64351e-05	34.5566	0.9928	1	201885234	T	C	0.36	-0.0001	0.0098	acne vulgaris	TRUE	reported	RJDyJS	399413				42.4492	29.5121	118.155
rs825127	1	223506788	T	G	0.530794	0.00577086	0.00102973	2e-08	mSTlyh	452071	DaytimeSleepiness	6.947e-05	31.4074	0.6764	1	223506788	G	T	0.5242	0.0039	0.0094	acne vulgaris	TRUE	reported	RJDyJS	399413				42.4492	29.5121	118.155
rs4665972	2	27598097	T	C	0.393644	0.00702837	0.00105545	2.7e-11	mSTlyh	452071	DaytimeSleepiness	9.80809e-05	44.3437	0.001906	2	27598097	C	T	0.6187	-0.03	0.0097	acne vulgaris	TRUE	reported	RJDyJS	399413				42.4492	29.5121	118.155
rs7598712	2	46660452	G	T	0.555254	0.00564357	0.00103885	4.4e-08	mSTlyh	452071	DaytimeSleepiness	6.5278e-05	29.5121	0.2664	2	46660452	T	G	0.4847	-0.0105	0.0095	acne vulgaris	TRUE	reported	RJDyJS	399413				42.4492	29.5121	118.155
rs6741951	2	58959112	G	A	0.710788	0.0076996	0.00113785	1.4e-11	mSTlyh	452071	DaytimeSleepiness	0.000101278	45.7893	0.8345	2	58959112	A	G	0.2405	0.0023	0.011	acne vulgaris	TRUE	reported	RJDyJS	399413				42.4492	29.5121	118.155
rs11123962	2	104157011	T	G	0.553234	-0.00760762	0.00103139	1.6e-13	mSTlyh	452071	DaytimeSleepiness	0.000120335	54.4064	0.05547	2	104157011	G	T	0.4448	-0.018	0.0094	acne vulgaris	TRUE	reported	RJDyJS	399413				42.4492	29.5121	118.155
rs7607363	2	213402705	A	G	0.561234	-0.00654917	0.0010354	3.1e-10	mSTlyh	452071	DaytimeSleepiness	8.84934e-05	40.0087	0.5283	2	213402705	G	A	0.4753	-0.0059	0.0094	acne vulgaris	TRUE	reported	RJDyJS	399413				42.4492	29.5121	118.155
rs13010456	2	236792801	A	G	0.594693	0.00734809	0.00104819	2.9e-12	mSTlyh	452071	DaytimeSleepiness	0.000108696	49.1436	0.1642	2	236792801	G	A	0.349	0.0137	0.0098	acne vulgaris	TRUE	reported	RJDyJS	399413				42.4492	29.5121	118.155
rs9821366	3	84561063	A	G	0.271013	0.00771163	0.00115503	3.5e-11	mSTlyh	452071	DaytimeSleepiness	9.85953e-05	44.5763	0.8462	3	84561063	G	A	0.7499	-0.0021	0.0109	acne vulgaris	TRUE	reported	RJDyJS	399413				42.4492	29.5121	118.155
rs843372	3	183996213	C	T	0.230053	0.00762125	0.00122243	3.8e-10	mSTlyh	452071	DaytimeSleepiness	8.59727e-05	38.8689	0.3185	3	183996213	T	C	0.7053	0.0103	0.0103	acne vulgaris	TRUE	reported	RJDyJS	399413				42.4492	29.5121	118.155
rs6897863	5	92512481	A	C	0.584415	0.00605866	0.00104426	6.9e-09	mSTlyh	452071	DaytimeSleepiness	7.44555e-05	33.6615	0.8208	5	92512481	C	A	0.4345	-0.0022	0.0095	acne vulgaris	TRUE	reported	RJDyJS	399413				42.4492	29.5121	118.155
rs12153518	5	138501494	A	G	0.47224	0.00679561	0.00102863	3.3e-11	mSTlyh	452071	DaytimeSleepiness	9.65361e-05	43.6452	0.661	5	138501494	G	A	0.5692	0.0042	0.0096	acne vulgaris	TRUE	reported	RJDyJS	399413				42.4492	29.5121	118.155
rs6923811	6	27289776	T	C	0.678973	0.00687507	0.0011019	4.5e-10	mSTlyh	452071	DaytimeSleepiness	8.61045e-05	38.9285	0.007124	6	27289776	C	T	0.2432	0.03	0.0111	acne vulgaris	TRUE	reported	RJDyJS	399413				42.4492	29.5121	118.155
rs55960940	6	38153146	T	C	0.822172	0.00755467	0.00134768	2.3e-08	mSTlyh	452071	DaytimeSleepiness	6.95057e-05	31.4236	0.769	6	38153146	C	T	0.2143	0.0034	0.0116	acne vulgaris	TRUE	reported	RJDyJS	399413				42.4492	29.5121	118.155
rs3122163	6	55056368	C	T	0.231114	0.00920223	0.00122324	3.4e-14	mSTlyh	452071	DaytimeSleepiness	0.00012517	56.5928	0.4199	6	55056368	T	C	0.8345	0.0102	0.0126	acne vulgaris	TRUE	reported	RJDyJS	399413				42.4492	29.5121	118.155
rs641498	6	124911565	A	G	0.392184	-0.00587812	0.00105586	2.5e-08	mSTlyh	452071	DaytimeSleepiness	6.85532e-05	30.9929	0.4917	6	124911565	G	A	0.6197	0.0068	0.0099	acne vulgaris	TRUE	reported	RJDyJS	399413				42.4492	29.5121	118.155
rs62519825	8	65479707	T	C	0.88741	-0.00893208	0.00162354	2.6e-08	mSTlyh	452071	DaytimeSleepiness	6.69489e-05	30.2676	0.6376	8	65479707	C	T	0.1311	-0.0068	0.0143	acne vulgaris	TRUE	reported	RJDyJS	399413				42.4492	29.5121	118.155
rs285793	8	106087862	G	A	0.461246	0.00657609	0.00103235	2.1e-10	mSTlyh	452071	DaytimeSleepiness	8.97503e-05	40.577	0.7121	8	106087862	A	G	0.5526	0.0035	0.0094	acne vulgaris	TRUE	reported	RJDyJS	399413				42.4492	29.5121	118.155
rs7837226	8	131235895	A	G	0.472852	-0.00570998	0.00102965	2.2e-08	mSTlyh	452071	DaytimeSleepiness	6.80227e-05	30.753	0.5179	8	131235895	G	A	0.5449	-0.0061	0.0094	acne vulgaris	TRUE	reported	RJDyJS	399413				42.4492	29.5121	118.155
rs13284688	9	81727018	T	C	0.793399	-0.0101903	0.00126801	1.1e-15	mSTlyh	452071	DaytimeSleepiness	0.000142843	64.5843	0.2117	9	81727018	C	T	0.1669	0.0159	0.0128	acne vulgaris	TRUE	reported	RJDyJS	399413				42.4492	29.5121	118.155
rs1566362	9	128163132	T	C	0.631731	0.00644926	0.00106555	1.6e-09	mSTlyh	452071	DaytimeSleepiness	8.10271e-05	36.6328	0.6499	9	128163132	C	T	0.3994	-0.0044	0.0096	acne vulgaris	TRUE	reported	RJDyJS	399413				42.4492	29.5121	118.155
rs7476897	10	92416402	G	A	0.679434	0.00732039	0.0010987	4.6e-11	mSTlyh	452071	DaytimeSleepiness	9.81886e-05	44.3924	0.0859	10	92416402	A	G	0.2961	-0.0177	0.0103	acne vulgaris	TRUE	reported	RJDyJS	399413				42.4492	29.5121	118.155
rs12253139	10	128899947	T	C	0.876007	-0.00851903	0.00155596	4.4e-08	mSTlyh	452071	DaytimeSleepiness	6.63053e-05	29.9765	0.03849	10	128899947	C	T	0.1399	0.028	0.0135	acne vulgaris	TRUE	reported	RJDyJS	399413				42.4492	29.5121	118.155
rs4765939	12	2582397	G	C	0.583272	-0.0062379	0.00104294	2.3e-09	mSTlyh	452071	DaytimeSleepiness	7.91256e-05	35.7731	0.4707	12	2582397	C	G	0.3535	0.0071	0.0099	acne vulgaris	TRUE	reported	RJDyJS	399413				42.4492	29.5121	118.155
rs1846644	12	117938380	T	C	0.590849	-0.0113557	0.00104469	1.8e-27	mSTlyh	452071	DaytimeSleepiness	0.000261296	118.155	0.9295	12	117938380	C	T	0.3731	0.0009	0.0097	acne vulgaris	TRUE	reported	RJDyJS	399413				42.4492	29.5121	118.155
rs7982022	13	54049003	G	A	0.562517	-0.0057991	0.00105449	4.4e-08	mSTlyh	452071	DaytimeSleepiness	6.68961e-05	30.2437	0.1213	13	54049003	A	G	0.4351	0.0148	0.0095	acne vulgaris	TRUE	reported	RJDyJS	399413				42.4492	29.5121	118.155
rs8015449	14	82161860	A	G	0.538612	0.00597228	0.0010316	6.2e-09	mSTlyh	452071	DaytimeSleepiness	7.41342e-05	33.5163	0.4158	14	82161860	G	A	0.4406	-0.0077	0.0095	acne vulgaris	TRUE	reported	RJDyJS	399413				42.4492	29.5121	118.155
rs2472297	15	75027880	C	T	0.734689	0.00637313	0.00116124	4.8e-08	mSTlyh	452071	DaytimeSleepiness	6.66233e-05	30.1203	0.6885	15	75027880	T	C	0.2659	0.0043	0.0107	acne vulgaris	TRUE	reported	RJDyJS	399413				42.4492	29.5121	118.155
rs17356118	15	83237899	A	G	0.76879	-0.00759808	0.00121728	3.2e-10	mSTlyh	452071	DaytimeSleepiness	8.61753e-05	38.9605	0.9458	15	83237899	G	A	0.2467	-0.0008	0.011	acne vulgaris	TRUE	reported	RJDyJS	399413				42.4492	29.5121	118.155
rs11078398	17	17697099	G	A	0.743669	0.00731193	0.00123757	3.8e-09	mSTlyh	452071	DaytimeSleepiness	7.72119e-05	34.9078	0.2595	17	17697099	A	G	0.3338	0.0112	0.01	acne vulgaris	TRUE	reported	RJDyJS	399413	TRUE	rs11078398	rs3803763	42.4492	29.5121	118.155
rs7207582	17	44210933	A	G	0.771994	0.00834668	0.0012248	1.2e-11	mSTlyh	452071	DaytimeSleepiness	0.000102718	46.4403	0.08475	17	44210933	G	A	0.137	0.0242	0.014	acne vulgaris	TRUE	reported	RJDyJS	399413				42.4492	29.5121	118.155

## Sheet: Table S5
Table S5. SNPs included for insomnia in the FinnGen Database
SNP	chr.exposure	pos.exposure	effect_allele.exposure	other_allele.exposure	eaf.exposure	beta.exposure	se.exposure	pval.exposure	samplesize.exposure	id.exposure	exposure	r2	F
rs77217059	2	58989880	A	G	0.1498	-0.0416556752688325	0.007246	8.756e-09	379343	t2tVCE	Insomnia	8.71127632795888e-05	33.0483216658646
rs11693221	2	66799986	T	C	0.0413	0.123102197133983	0.01265	3.141e-22	377330	t2tVCE	Insomnia	0.000250911310608951	94.6996242162805
rs55683518	2	147484316	G	T	0.37	-0.0293258293818287	0.005322	3.551e-08	381157	t2tVCE	Insomnia	7.96548770261483e-05	30.3632732356973
rs1456193	3	117637697	T	C	0.1801	-0.0373903892185591	0.006676	2.13e-08	383816	t2tVCE	Insomnia	8.17200735643554e-05	31.3678716998124
rs77960	5	103964585	A	G	0.3271	0.0324671901375014	0.005429	1.658e-09	382586	t2tVCE	Insomnia	9.34716815085472e-05	35.7641127300206
rs6938026	6	43185733	G	A	0.2093	0.0372957847436969	0.006239	2.718e-09	385182	t2tVCE	Insomnia	9.27648090616756e-05	35.7344640551112
rs370771	6	105398086	G	T	0.4539	-0.0345914447696191	0.005121	1.475e-11	385316	t2tVCE	Insomnia	0.000118402094112628	45.6273868690675
rs6984111	8	10211788	C	T	0.1607	0.043059489460447	0.007393	4.254e-09	386533	t2tVCE	Insomnia	8.77549553351562e-05	33.9229875509106
rs4073582	11	66050712	A	G	0.3589	-0.0311811174835747	0.005319	4.667e-09	385580	t2tVCE	Insomnia	8.91189715303264e-05	34.3653774118114
rs9576155	13	37600284	A	G	0.3392	0.0305292050348228	0.005384	9.264e-09	383032	t2tVCE	Insomnia	8.3936213990661e-05	32.1527868280385
rs6561715	13	53888526	T	A	0.3685	0.0372957847436969	0.005302	1.709e-12	381541	t2tVCE	Insomnia	0.000129670898401331	49.4809211406436
rs4986172	17	43216281	T	C	0.342	0.0372957847436969	0.005357	5.204e-12	386533	t2tVCE	Insomnia	0.000125381994171409	48.4701048674749
rs7228159	18	53104253	A	T	0.3427	0.0295588022415444	0.005354	4.081e-08	385746	t2tVCE	Insomnia	7.9009840296503e-05	30.4799800536905

## Sheet: Table S6
Table S6. SNPs included for insomnia in the Estonian Database
SNP	chr.exposure	pos.exposure	effect_allele.exposure	other_allele.exposure	eaf.exposure	beta.exposure	se.exposure	pval.exposure	samplesize.exposure	id.exposure	exposure	r2	F	pval.outcome	chr.outcome	pos.outcome	effect_allele.outcome	other_allele.outcome	eaf.outcome	beta.outcome	se.outcome	outcome	mr_keep.outcome	pval_origin.outcome	id.outcome	samplesize.outcome	proxy.outcome	target_snp.outcome	proxy_snp.outcome	meanF	minF	maxF
rs77217059	2	58989880	A	G	0.1498	-0.0416557	0.007246	8.756e-09	379343	t2tVCE	Insomnia	8.71128e-05	33.0483	0.7539	2	58989880	A	G	0.1218	0.0046	0.0145	acne vulgaris	TRUE	reported	RJDyJS	399413				41.1906	30.3633	94.6996
rs11693221	2	66799986	T	C	0.0413	0.123102	0.01265	3.141e-22	377330	t2tVCE	Insomnia	0.000250911	94.6996	0.1822	2	66799986	T	C	0.0472	-0.0303	0.0227	acne vulgaris	TRUE	reported	RJDyJS	399413				41.1906	30.3633	94.6996
rs55683518	2	147484316	G	T	0.37	-0.0293258	0.005322	3.551e-08	381157	t2tVCE	Insomnia	7.96549e-05	30.3633	0.1582	2	147484316	G	T	0.4111	-0.0134	0.0095	acne vulgaris	TRUE	reported	RJDyJS	399413				41.1906	30.3633	94.6996
rs1456193	3	117637697	T	C	0.1801	-0.0373904	0.006676	2.13e-08	383816	t2tVCE	Insomnia	8.17201e-05	31.3679	0.2113	3	117637697	C	T	0.8126	-0.015	0.012	acne vulgaris	TRUE	reported	RJDyJS	399413				41.1906	30.3633	94.6996
rs77960	5	103964585	A	G	0.3271	0.0324672	0.005429	1.658e-09	382586	t2tVCE	Insomnia	9.34717e-05	35.7641	0.7398	5	103964585	A	G	0.3176	0.0034	0.0102	acne vulgaris	TRUE	reported	RJDyJS	399413				41.1906	30.3633	94.6996
rs6938026	6	43185733	G	A	0.2093	0.0372958	0.006239	2.718e-09	385182	t2tVCE	Insomnia	9.27648e-05	35.7345	0.4296	6	43185733	G	A	0.2045	-0.0092	0.0116	acne vulgaris	TRUE	reported	RJDyJS	399413	TRUE	rs6938026	rs2273709	41.1906	30.3633	94.6996
rs370771	6	105398086	G	T	0.4539	-0.0345914	0.005121	1.475e-11	385316	t2tVCE	Insomnia	0.000118402	45.6274	0.9052	6	105398086	T	G	0.5538	0.0011	0.0094	acne vulgaris	TRUE	reported	RJDyJS	399413				41.1906	30.3633	94.6996
rs6984111	8	10211788	C	T	0.1607	0.0430595	0.007393	4.254e-09	386533	t2tVCE	Insomnia	8.7755e-05	33.923	0.736	8	10211788	T	C	0.8153	0.0041	0.0121	acne vulgaris	TRUE	reported	RJDyJS	399413				41.1906	30.3633	94.6996
rs4073582	11	66050712	A	G	0.3589	-0.0311811	0.005319	4.667e-09	385580	t2tVCE	Insomnia	8.9119e-05	34.3654	0.6626	11	66050712	A	G	0.3038	0.0045	0.0102	acne vulgaris	TRUE	reported	RJDyJS	399413	TRUE	rs4073582	rs524859	41.1906	30.3633	94.6996
rs9576155	13	37600284	A	G	0.3392	0.0305292	0.005384	9.264e-09	383032	t2tVCE	Insomnia	8.39362e-05	32.1528	0.2933	13	37600284	A	G	0.3527	0.0104	0.0099	acne vulgaris	TRUE	reported	RJDyJS	399413				41.1906	30.3633	94.6996
rs6561715	13	53888526	T	A	0.3685	0.0372958	0.005302	1.709e-12	381541	t2tVCE	Insomnia	0.000129671	49.4809	0.6013	13	53888526	A	T	0.6289	0.0051	0.0098	acne vulgaris	TRUE	reported	RJDyJS	399413				41.1906	30.3633	94.6996
rs4986172	17	43216281	T	C	0.342	0.0372958	0.005357	5.204e-12	386533	t2tVCE	Insomnia	0.000125382	48.4701	0.44	17	43216281	T	C	0.3154	0.0078	0.0101	acne vulgaris	TRUE	reported	RJDyJS	399413	TRUE	rs4986172	rs9894577	41.1906	30.3633	94.6996
rs7228159	18	53104253	A	T	0.3427	0.0295588	0.005354	4.081e-08	385746	t2tVCE	Insomnia	7.90098e-05	30.48	0.1908	18	53104253	T	A	0.7351	-0.014	0.0107	acne vulgaris	TRUE	reported	RJDyJS	399413				41.1906	30.3633	94.6996

## Sheet: Table S7
Table S7. SNPs included for physical activity in the FinnGen Database
SNP	chr.exposure	pos.exposure	effect_allele.exposure	other_allele.exposure	eaf.exposure	beta.exposure	se.exposure	pval.exposure	samplesize.exposure	id.exposure	exposure	r2	F
rs34517439	1	78450517	A	C	0.120868	-0.315885	0.0580128	4.60002e-08	ebi-a-GCST90093322	89683	Physical activity	0.000330488743605432	29.65
rs111205056	1	84358066	C	T	0.037548	-0.564748	0.110177	2.90001e-07	ebi-a-GCST90093322	89683	Physical activity	0.000292880309686677	26.27
rs12045968	1	33690698	G	T	0.21694	0.227266	0.0453401	4.90004e-07	ebi-a-GCST90093322	89683	Physical activity	0.0002800736234842	25.12
rs6541235	1	219872389	T	C	0.147655	-0.248368	0.0526221	2.59998e-06	ebi-a-GCST90093322	89683	Physical activity	0.000248334431191833	22.28
rs1217204	1	114126220	C	G	0.769033	0.219126	0.0444946	8.40001e-07	ebi-a-GCST90093322	89683	Physical activity	0.000270361998617118	24.25
rs791273	1	147234618	G	A	0.25142	0.203348	0.043279	2.69998e-06	ebi-a-GCST90093322	89683	Physical activity	0.000246098153994604	22.08
rs76223101	2	118974070	A	G	0.051383	0.427965	0.0876714	1.09999e-06	ebi-a-GCST90093322	89683	Physical activity	0.000265628774277417	23.83
rs12989603	2	152216827	C	A	0.301523	-0.213397	0.0407425	1.79999e-07	ebi-a-GCST90093322	89683	Physical activity	0.000305800587638638	27.43
rs34908	3	10452942	A	G	0.276826	0.199105	0.042079	2.1e-06	ebi-a-GCST90093322	89683	Physical activity	0.000249582987249556	22.39
rs6775319	3	18758501	T	A	0.729077	-0.209998	0.0421183	5.80003e-07	ebi-a-GCST90093322	89683	Physical activity	0.000277113801863174	24.86
rs7626095	3	176320312	T	C	0.438066	0.179866	0.0383166	2.90001e-06	ebi-a-GCST90093322	89683	Physical activity	0.000245644700926133	22.04
rs7658462	4	3283422	T	C	0.171193	-0.24961	0.0498558	6.59994e-07	ebi-a-GCST90093322	89683	Physical activity	0.000279422314483764	25.07
rs351091	4	132424371	A	C	0.234777	0.206784	0.0441798	2.99999e-06	ebi-a-GCST90093322	89683	Physical activity	0.000244213783410377	21.91
rs73249344	4	19543063	G	A	0.186114	0.231353	0.0482927	1.6e-06	ebi-a-GCST90093322	89683	Physical activity	0.000255838585804543	22.95
rs13125511	4	48484887	T	C	0.266479	-0.194552	0.0425283	4.39997e-06	ebi-a-GCST90093322	89683	Physical activity	0.000233294175444606	20.93
rs4921269	5	158369472	C	A	0.610288	0.176352	0.0384503	4.30002e-06	ebi-a-GCST90093322	89683	Physical activity	0.000234503500757849	21.04
rs10067451	5	87942506	A	G	0.113071	-0.333144	0.0601533	2.99999e-08	ebi-a-GCST90093322	89683	Physical activity	0.000341890035035329	30.67
rs10475334	5	6572494	A	G	0.128419	-0.266046	0.0561067	2.30001e-06	ebi-a-GCST90093322	89683	Physical activity	0.000250648447798529	22.48
rs6895232	5	152039421	A	T	0.337004	-0.219742	0.0402422	5e-08	ebi-a-GCST90093322	89683	Physical activity	0.000332359595893703	29.82
rs945890	6	130321899	T	A	0.71265	0.206168	0.0415617	7.00003e-07	ebi-a-GCST90093322	89683	Physical activity	0.000274300524734323	24.61
rs144567362	7	332469	G	T	0.724433	0.213766	0.0467174	4.90004e-06	ebi-a-GCST90093322	89683	Physical activity	0.000233404071090912	20.94
rs532259022	8	4856717	C	A	0.568515	0.191284	0.0394233	1.2e-06	ebi-a-GCST90093322	89683	Physical activity	0.000262438303725613	23.54
rs73715570	8	145025298	T	C	0.229721	0.21023	0.04494	2.90001e-06	ebi-a-GCST90093322	89683	Physical activity	0.000243953557880922	21.88
rs10120942	9	87597283	A	C	0.569852	-0.185275	0.0378285	9.90011e-07	ebi-a-GCST90093322	89683	Physical activity	0.000267404755863236	23.99
rs1268539	9	128195657	A	C	0.418775	0.213697	0.0379602	1.89998e-08	ebi-a-GCST90093322	89683	Physical activity	0.000353245224853263	31.69
rs10809491	9	11474608	C	T	0.255031	-0.220498	0.0430216	2.59998e-07	ebi-a-GCST90093322	89683	Physical activity	0.000292818746706651	26.27
rs34719019	10	21885577	T	A	0.272944	-0.241562	0.0421424	9.69996e-09	ebi-a-GCST90093322	89683	Physical activity	0.000366226272577349	32.86
rs9300002	11	29129168	C	T	0.420986	0.198554	0.0380557	1.7e-07	ebi-a-GCST90093322	89683	Physical activity	0.000303442159839761	27.22
rs148193266	11	104528681	C	A	0.04254	0.459217	0.0952417	1.40001e-06	ebi-a-GCST90093322	89683	Physical activity	0.000259154613925465	23.25
rs10880697	12	38594529	C	G	0.339215	0.206675	0.0396985	1.79999e-07	ebi-a-GCST90093322	89683	Physical activity	0.000302124774652674	27.1
rs78982639	12	70604120	A	G	0.011409	-0.837527	0.177477	2.19999e-06	ebi-a-GCST90093322	89683	Physical activity	0.00024825357955239	22.27
rs35058145	12	98134238	A	G	0.036573	0.45734	0.100042	4.70002e-06	ebi-a-GCST90093322	89683	Physical activity	0.000232971248284053	20.9
rs9529057	13	66984458	A	G	0.473558	0.183271	0.0375319	1e-06	ebi-a-GCST90093322	89683	Physical activity	0.000265803575232008	23.84
rs1105867	15	83439083	C	T	0.775691	0.228027	0.0449976	3.79997e-07	ebi-a-GCST90093322	89683	Physical activity	0.000286259151405766	25.68
rs5742915	15	74336633	C	T	0.460461	0.177428	0.0375896	2.39999e-06	ebi-a-GCST90093322	89683	Physical activity	0.00024836528980835	22.28
rs9938281	16	49625336	G	A	0.52607	0.191731	0.0377527	3.29997e-07	ebi-a-GCST90093322	89683	Physical activity	0.000287510447886768	25.79
rs12446623	16	61747669	G	T	0.145295	0.251017	0.0533453	2.39999e-06	ebi-a-GCST90093322	89683	Physical activity	0.000246829241562552	22.14
rs12448218	16	8705547	A	G	0.339703	0.188139	0.0396079	2.1e-06	ebi-a-GCST90093322	89683	Physical activity	0.000251521233065518	22.56
rs75986475	16	71464058	G	C	0.118498	0.281739	0.0584516	1.29999e-06	ebi-a-GCST90093322	89683	Physical activity	0.000258987325914169	23.23
rs2668658	17	44282472	C	T	0.182176	0.34912	0.0516161	1.20005e-11	ebi-a-GCST90093322	89683	Physical activity	0.000509855926727321	45.75
rs2683156	17	71747610	C	T	0.439794	-0.176646	0.037795	2.90001e-06	ebi-a-GCST90093322	89683	Physical activity	0.000243513486659328	21.84
rs59499656	18	40768309	T	A	0.344089	0.21528	0.0394668	5e-08	ebi-a-GCST90093322	89683	Physical activity	0.000331657140139616	29.75
rs186056728	18	221643	G	C	0.032406	0.570405	0.110197	2.5e-07	ebi-a-GCST90093322	89683	Physical activity	0.000298667005959643	26.79
rs1668835	18	22478952	A	T	0.3114	0.209833	0.0405127	2e-07	ebi-a-GCST90093322	89683	Physical activity	0.000299037178569475	26.83
rs12460611	19	30326600	G	A	0.322947	-0.188396	0.0402585	2.69998e-06	ebi-a-GCST90093322	89683	Physical activity	0.000244124863837097	21.9
rs28432971	19	3307259	A	T	0.373829	0.18741	0.0392585	1.79999e-06	ebi-a-GCST90093322	89683	Physical activity	0.000254037393985737	22.79
rs6081105	20	1886493	G	A	0.601307	0.198277	0.0383172	2.19999e-07	ebi-a-GCST90093322	89683	Physical activity	0.000298481467428902	26.78
rs133309	22	42398606	A	G	0.946612	-0.418335	0.0838665	5.19996e-07	ebi-a-GCST90093322	89683	Physical activity	0.000277358043722807	24.88

[truncated: 8 more sheets: Table S8, Table S9, Table S10, Table S11, Table S12, Table S13, Table S14, Table S15]
